# Supplementary material for: Dinuclear palladium(ii) compounds with bridging cyclometalated phosphines. Synthesis, crystal structure and electrochemical study
Source: Royal Society of Chemistry journal article supplement (doi:10.1039/b609829k), 2006-01-01
Supplement: b609829k.pdf [file b609829k.pdf]

# Dinuclear Palladium (II) Compounds with Bridging Cyclometalated Phosphines. Crystal Structure and Electrochemical Study.

*Igor Koshevoy,<sup>[a]</sup> Pascual Lahuerta, <sup>\*[a]</sup>*

*Mercedes Sanai,<sup>[a]</sup> M. Angeles Ubeda\* <sup>[a]</sup> and*

*Antonio Doménech<sup>[b]</sup>*

**Supporting Information**

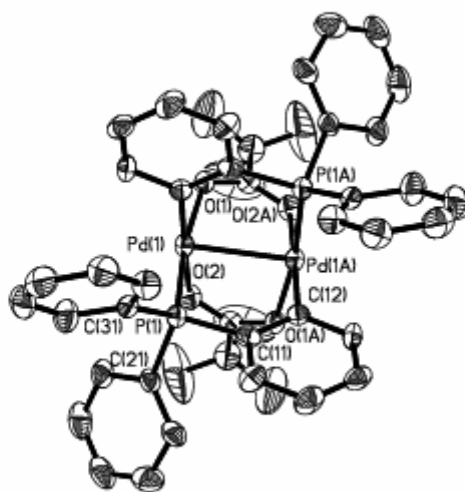

**Fig.SI 1.** ORTEP diagram for Compound 5. Ellipsoids represented at 30% probability.  
Hydrogen atoms omitted for clarity.

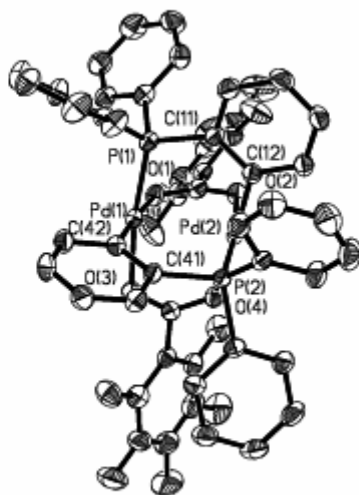

**Fig.SI 2.** ORTEP diagram for Compound **6**. Ellipsoids represented at 30% probability.  
Hydrogen atoms omitted for clarity.

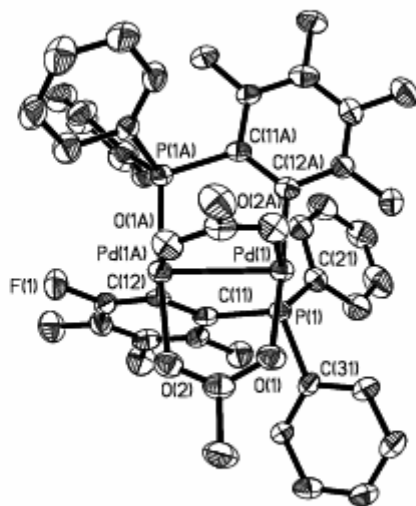

**Fig.SI 3. C.** ORTEP diagram for Compound 7. Ellipsoids represented at 30% probability.  
Hydrogen atoms omitted for clarity.

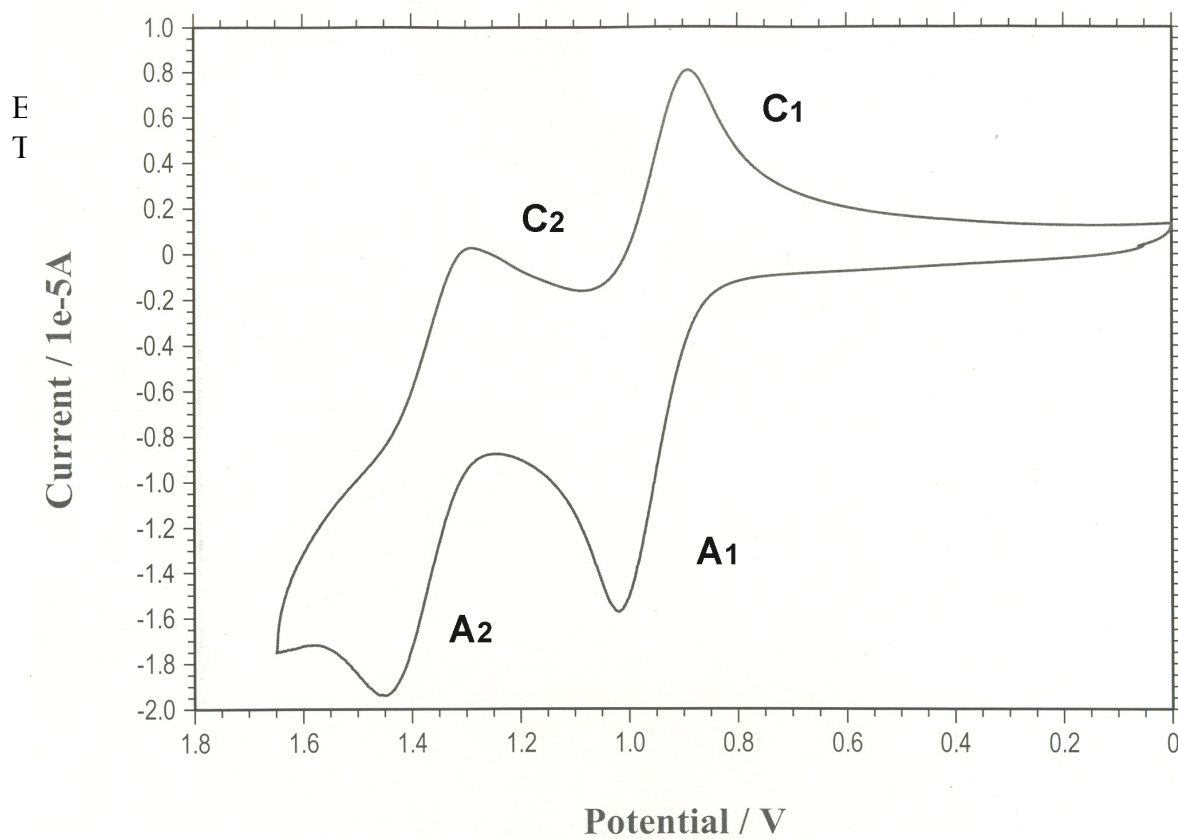

Fig. SI 4. CV at glassy carbon electrode for 1.0 mM solution of **3** in 0.10 M  $\text{Bu}_4\text{NPF}_6/\text{CH}_2\text{Cl}_2$ . Potential scan rate  $0.050 \text{ V s}^{-1}$ .

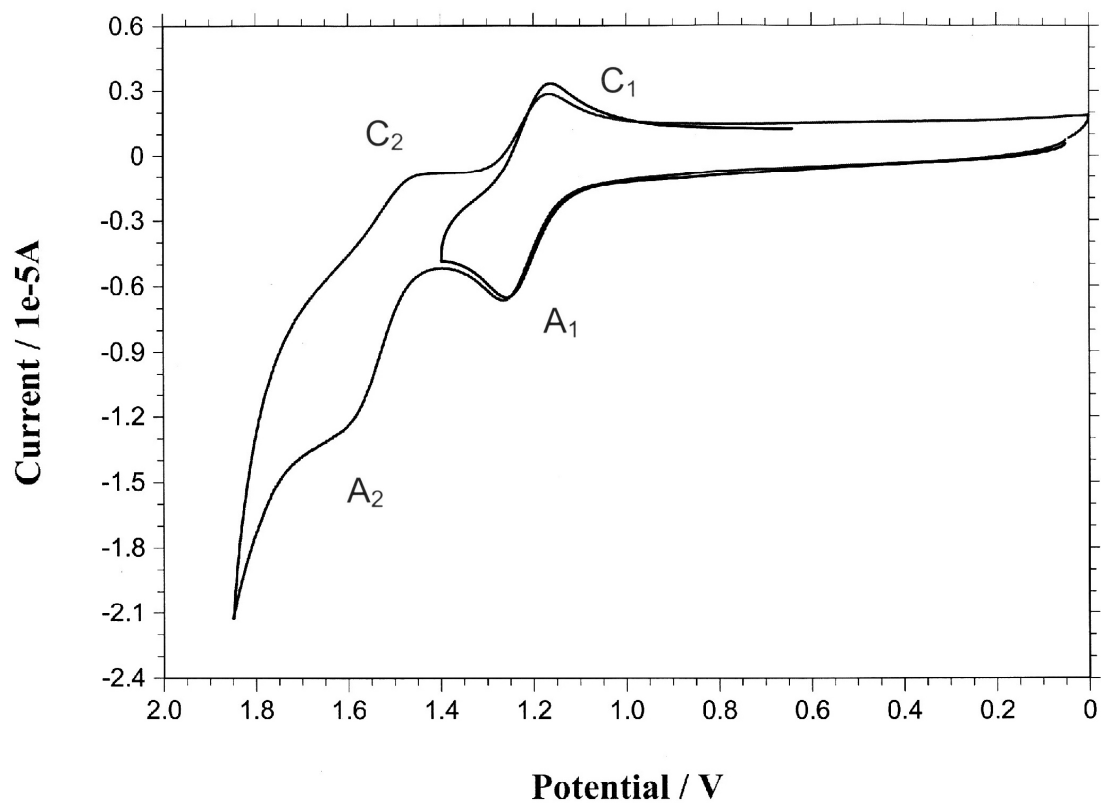

Fig. SI 5. CV at glassy carbon electrode for 1.0 mM solution of **4** in 0.10 M  $\text{Bu}_4\text{NPF}_6/\text{CH}_2\text{Cl}_2$ . Potential scan rate  $0.050 \text{ V s}^{-1}$ .

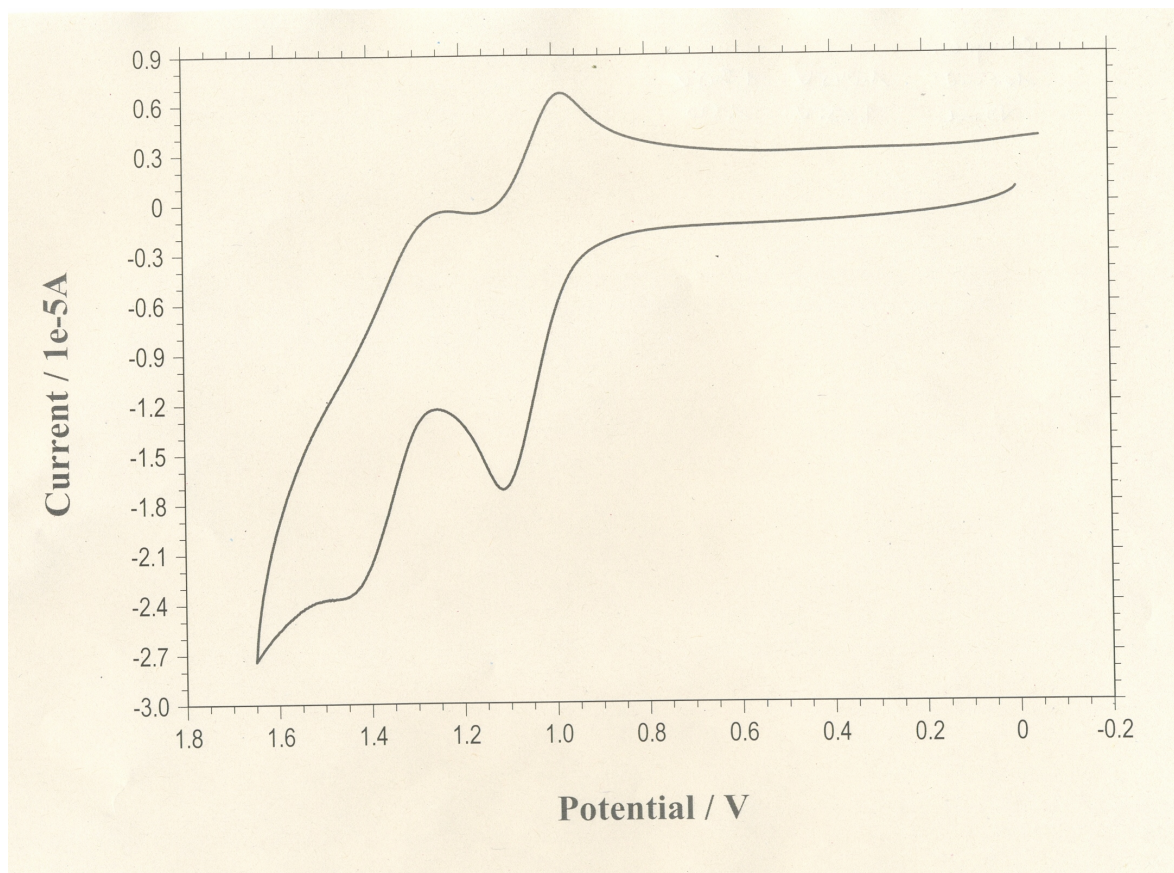

Fig. SI 6. CV at glassy carbon electrode for 1.0 mM solution of **6** in 0.10 M  $\text{Bu}_4\text{NPF}_6/\text{CH}_2\text{Cl}_2$ . Potential scan rate  $0.050 \text{ V s}^{-1}$ .

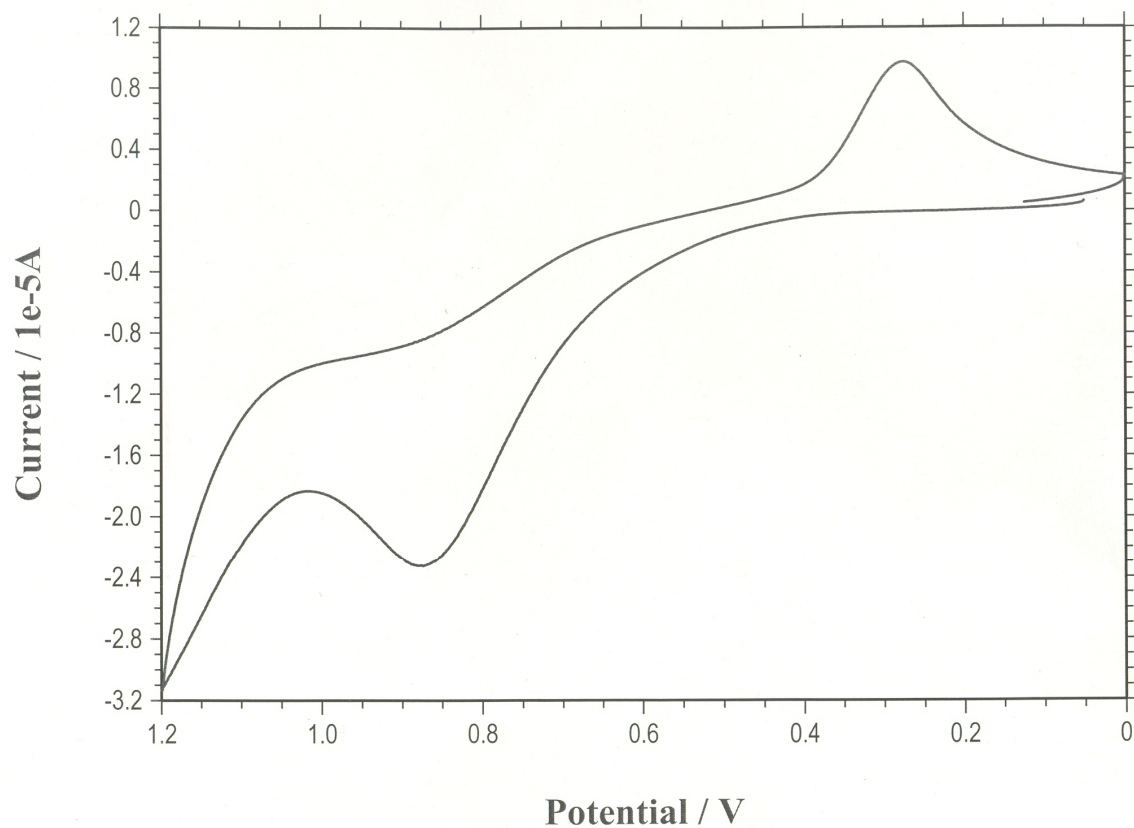

Fig. SI 7. CV at glassy carbon electrode for 1.0 mM solution of **3** and stoichiometric amount of  $\text{NEt}_4^+ \text{Cl}^-$  in 0.10 M  $\text{Bu}_4\text{NPF}_6/\text{CH}_2\text{Cl}_2$ . Potential scan rate  $0.050 \text{ V s}^{-1}$ .



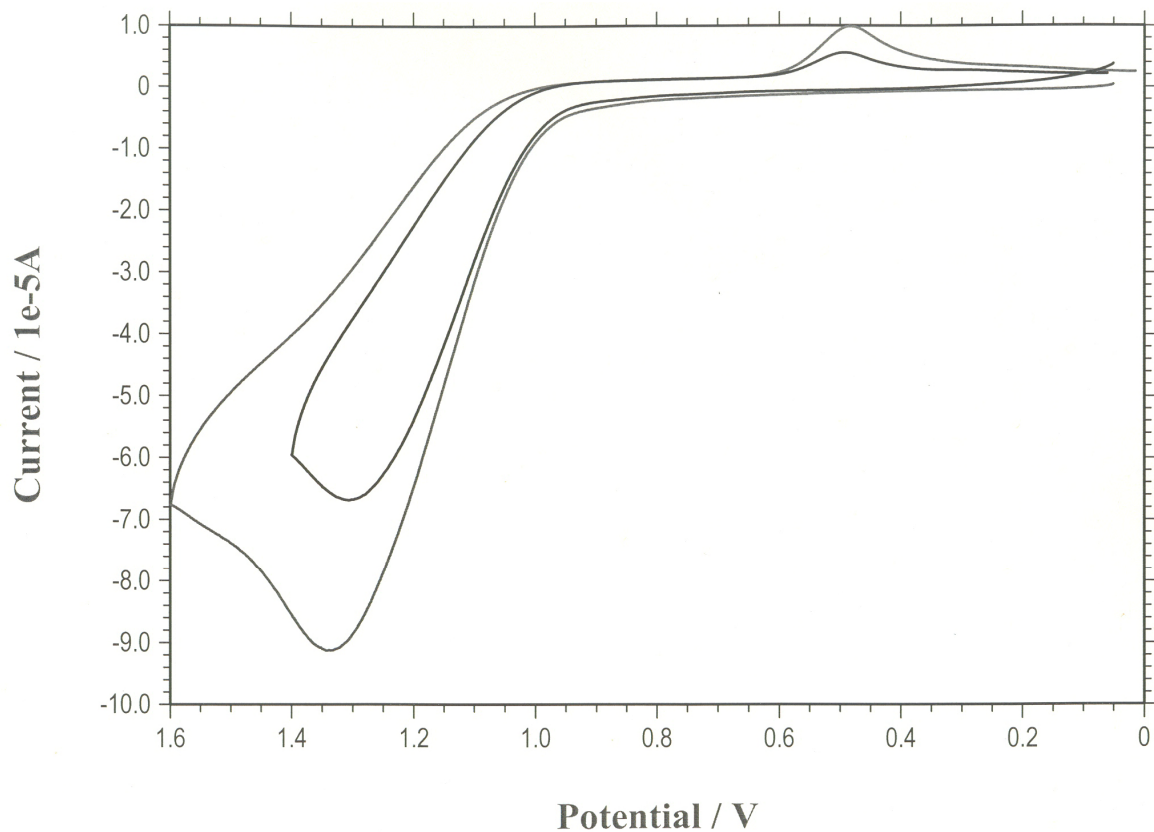

Fig. SI 8. CV at glassy carbon electrode for 1.0 mM solution of **4** and stoichiometric amount of  $\text{NEt}_4^+ \text{Cl}^-$  in 0.10 M  $\text{Bu}_4\text{NPF}_6/\text{CH}_2\text{Cl}_2$ . Potential scan rate  $0.050 \text{ V s}^{-1}$ .

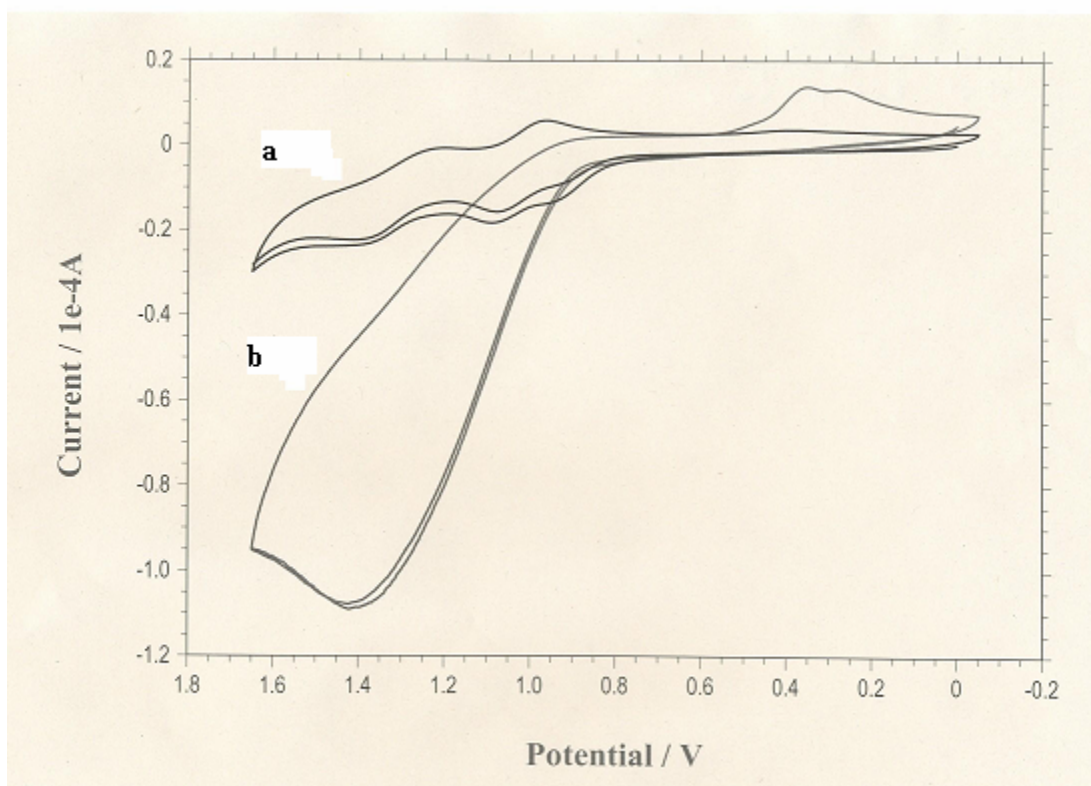

Fig. SI 9. CV at glassy carbon electrode for 1.0 mM solution of **6** and a) stoichiometric or b) excess amount of  $\text{NEt}_4^+ \text{Cl}^-$  in 0.10 M  $\text{Bu}_4\text{NPF}_6/\text{CH}_2\text{Cl}_2$ . Potential scan rate  $0.050 \text{ V s}^{-1}$ .

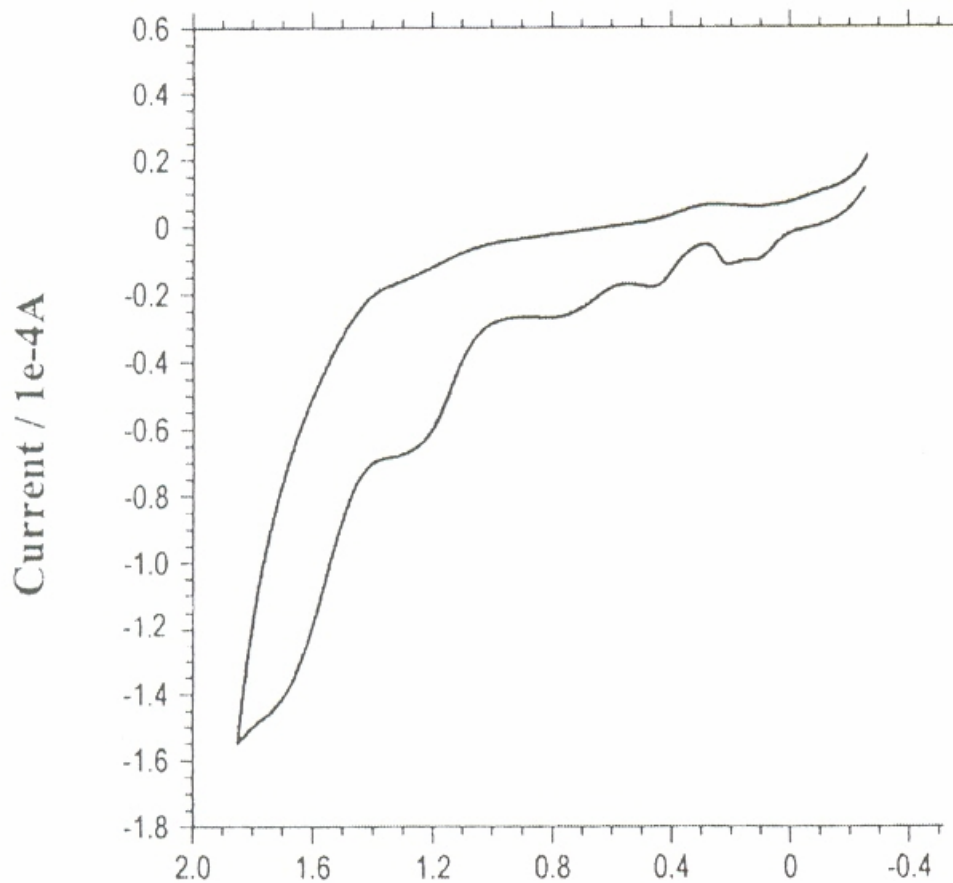

Fig. SI 10. CV at glassy carbon electrode for 1.0 mM solution of **7** in 0.10 M  $\text{Bu}_4\text{NPF}_6/\text{CH}_2\text{Cl}_2$ . Potential scan rate  $0.050 \text{ V s}^{-1}$ .

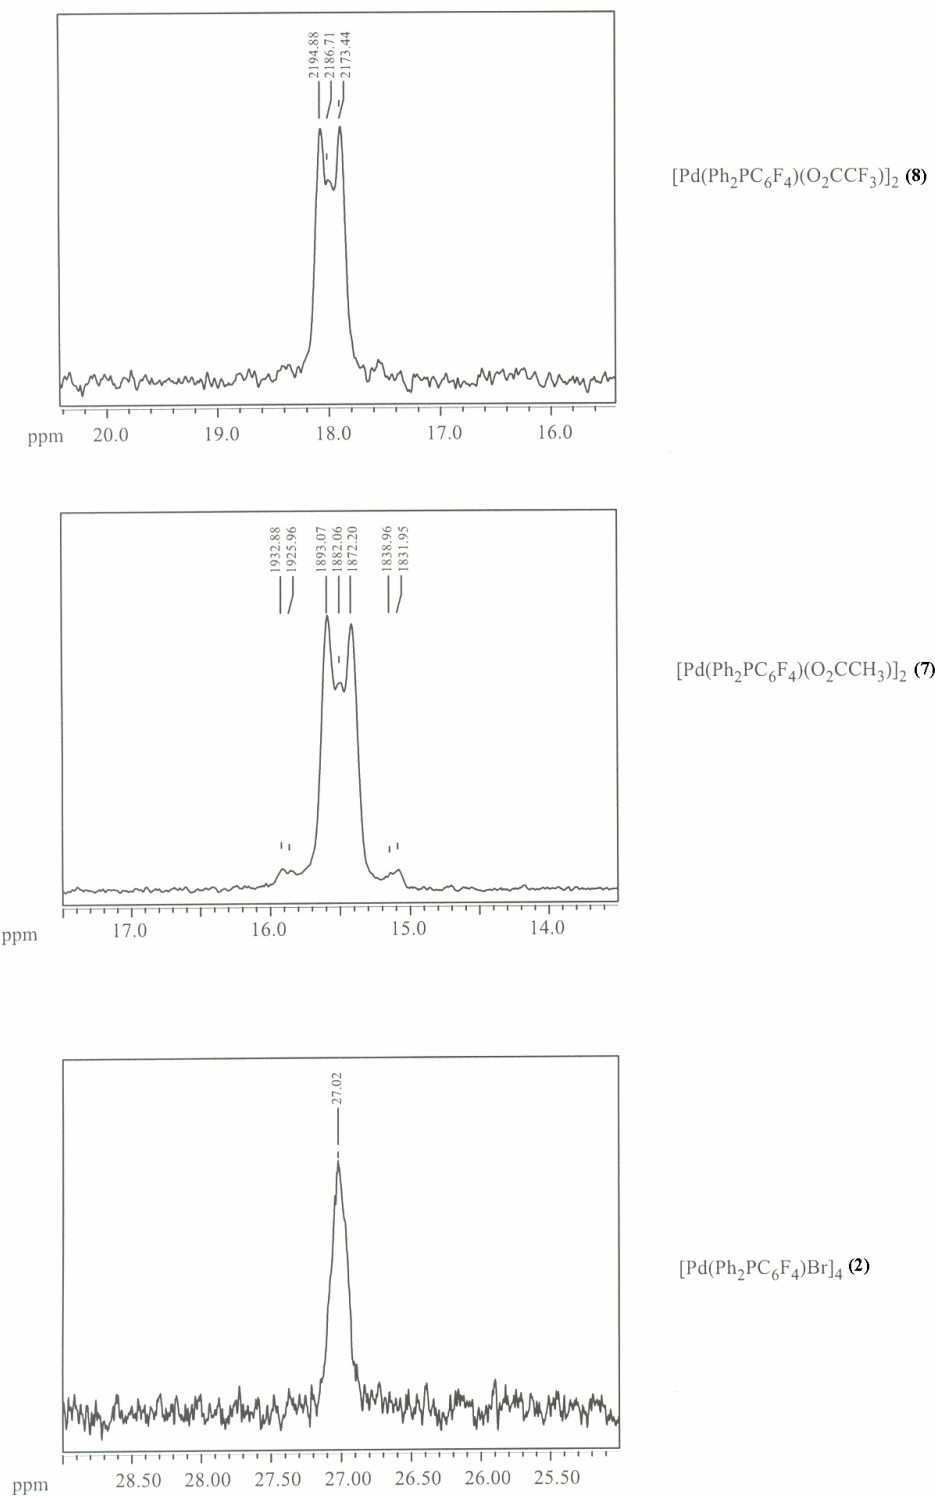

Fig. SI 11.  $^{31}\text{P}$  NMR of compounds **8**, **7** and **2**.

**Table SI 1.** Important bond distances and angles.

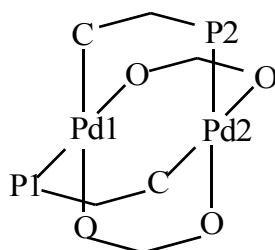

| Compound                                         | 4          | 5          | 6          | 7          | 8          |
|--------------------------------------------------|------------|------------|------------|------------|------------|
| <b>Bond lengths, (Å)</b>                         |            |            |            |            |            |
| Pd1-Pd2                                          | 2.7229(8)  | 2.6779(15) | 2.7078(6)  | 2.6749(14) | 2.7054(6)  |
| Pd1-P1                                           | 2.2273(12) | 2.226(3)   | 2.2303(17) | 2.243(3)   | 2.2294(11) |
| Pd2-P2                                           | 2.2269(12) |            | 2.2241(16) |            |            |
| Pd1-O <sub>transP</sub>                          | 2.170(3)   | 2.132(7)   | 2.148(4)   | 2.094(7)   | 2.148(3)   |
| Pd1-O <sub>transC</sub>                          | 2.158(3)   | 2.124(7)   | 2.141(4)   | 2.074(7)   | 2.116(3)   |
| Pd1-C                                            | 1.982(4)   | 1.974(10)  | 1.992(6)   | 1.993(9)   | 1.987(4)   |
| Pd2-O <sub>transP</sub>                          | 2.164(3)   |            | 2.158(5)   |            |            |
| Pd2-O <sub>transC</sub>                          | 2.163(3)   |            | 2.148(4)   |            |            |
| Pd2-C                                            | 1.980(4)   |            | 1.991(6)   |            |            |
| <b>Torsion angles, <sup>(o)</sup></b>            |            |            |            |            |            |
| P1-Pd1-Pd2-P2                                    | 94.3(1)    | 96.3(1)    | 96.8(1)    | 98.9(1)    | 91.2(1)    |
| P1-Pd1-Pd2-C                                     | 7.8(1)     | 8.4(1)     | 10.1(2)    | 7.0(1)     | 4.5(1)     |
| P2-Pd2-Pd1-C                                     | 8.4(1)     |            | 8.4(2)     |            |            |
| O <sub>transP</sub> -Pd1-Pd2-O <sub>transC</sub> | 11.7(1)    | 13.3(1)    | 11.4(2)    | 9.5(1)     | 7.0(1)     |
| O <sub>transC</sub> -Pd1-Pd2-O <sub>transP</sub> | 11.5(1)    |            | 11.7(2)    |            |            |
| <b>Angles around Pd-Pd, <sup>(o)</sup></b>       |            |            |            |            |            |
| Pd1-Pd2-C                                        | 95.14(11)  | 95.7(3)    | 95.29(18)  | 94.4(3)    | 93.22(11)  |
| C-Pd2-Pd1                                        | 95.12(11)  |            | 95.93(18)  |            |            |
| O <sub>transP</sub> -Pd1-Pd2                     | 82.90(8)   | 83.3(2)    | 85.45(12)  | 82.6(2)    | 84.56(8)   |
| O <sub>transC</sub> -Pd1-Pd2                     | 83.64(8)   | 83.4(2)    | 82.25(12)  | 84.8(2)    | 83.33(8)   |
| Pd1-Pd2-O <sub>transP</sub>                      | 82.93(8)   |            | 81.56(12)  |            |            |
| O <sub>transC</sub> -Pd2-Pd1                     | 83.70(8)   |            | 84.73(12)  |            |            |
| Pd1-Pd2-P2                                       | 87.35(3)   | 87.83(6)   | 87.74(4)   | 89.41(7)   | 89.89(3)   |

P1-Pd1-Pd2

87.50(3)

86.85(4)
